# Supplementary material for: Different stabilities of liposomes containing saturated and unsaturated lipids toward the addition of cyclodextrins
Source: Royal Society of Chemistry journal article supplement (doi:10.1039/c6ob00535g), 2016-01-01
Supplement: c6ob00535g1.pdf [file c6ob00535g1.pdf]

## Electronic Supplementary Information

### **Different stabilities of liposomes containing saturated and unsaturated lipids toward the addition of cyclodextrins**

Atsushi Ikeda,\* Rikushi Funada and Kouta Sugikawa

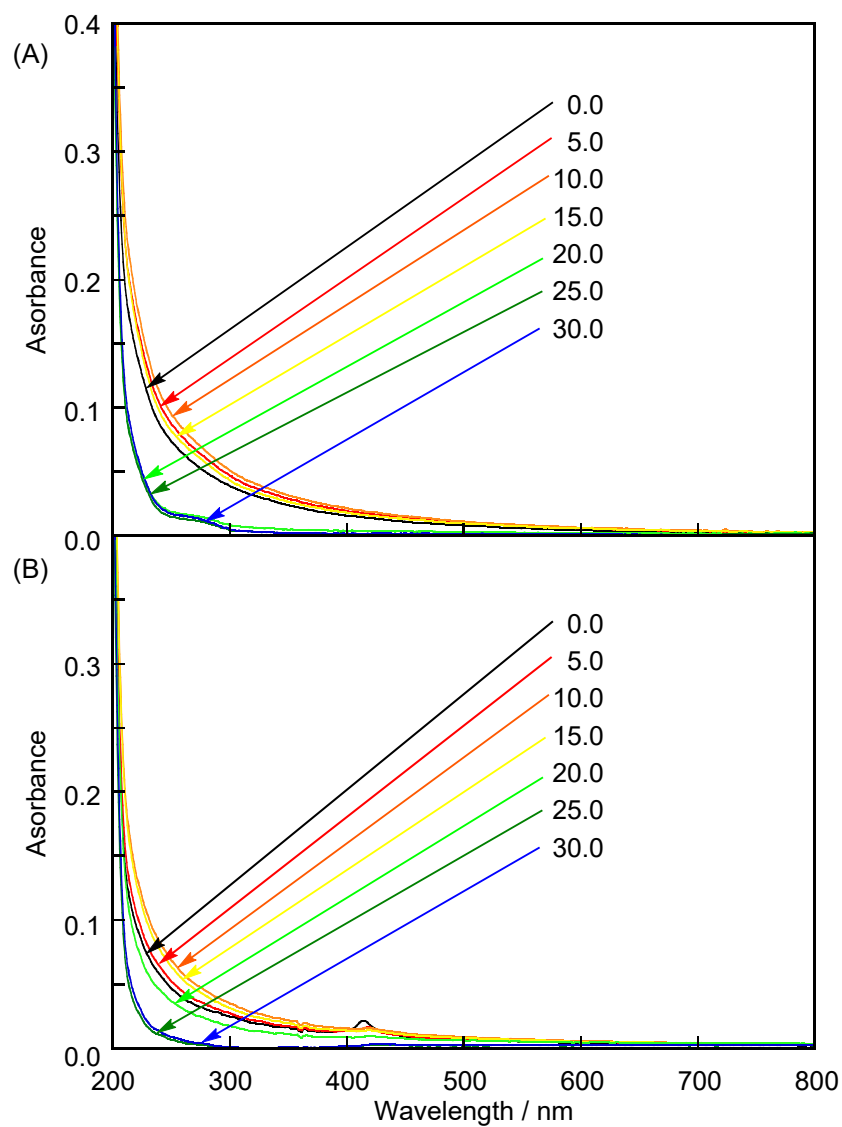

**Fig. S1** Changes in the UV-vis absorption spectra of (A) POPC liposome and (B) DOPC liposome in the presence of several different concentrations of DMe- $\beta$ -CDx (0.0, 5.0, 10.0, 15.0, 20.0, 25.0 and 30.0 equiv.), ([lipid] = 1.0 mM).

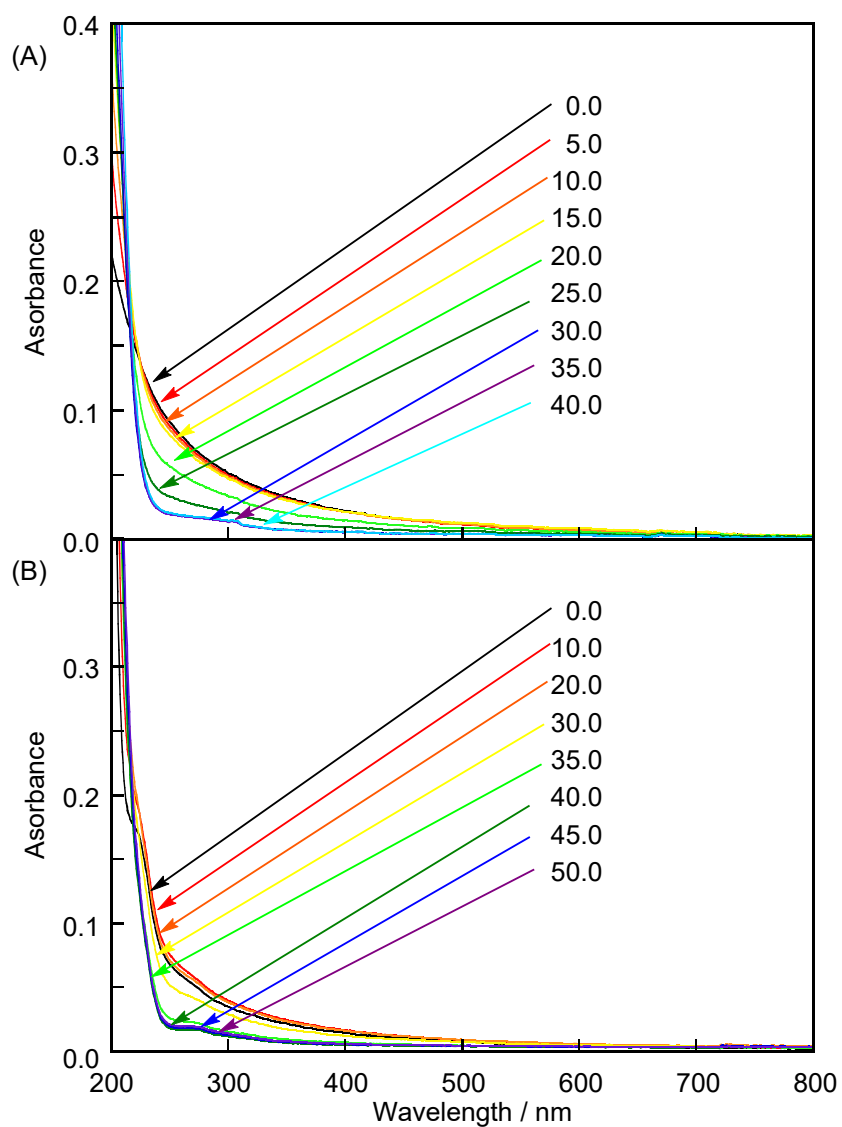

**Fig. S2** Changes in the UV-vis absorption spectra of (A) DPPC liposome and (B) DOPC liposome in the presence of several different concentrations of DMe- $\alpha$ -CDx (0.0, 5.0, 10.0, 15.0, 20.0, 25.0 and 30.0 equiv.), ([lipid] = 1.0 mM).

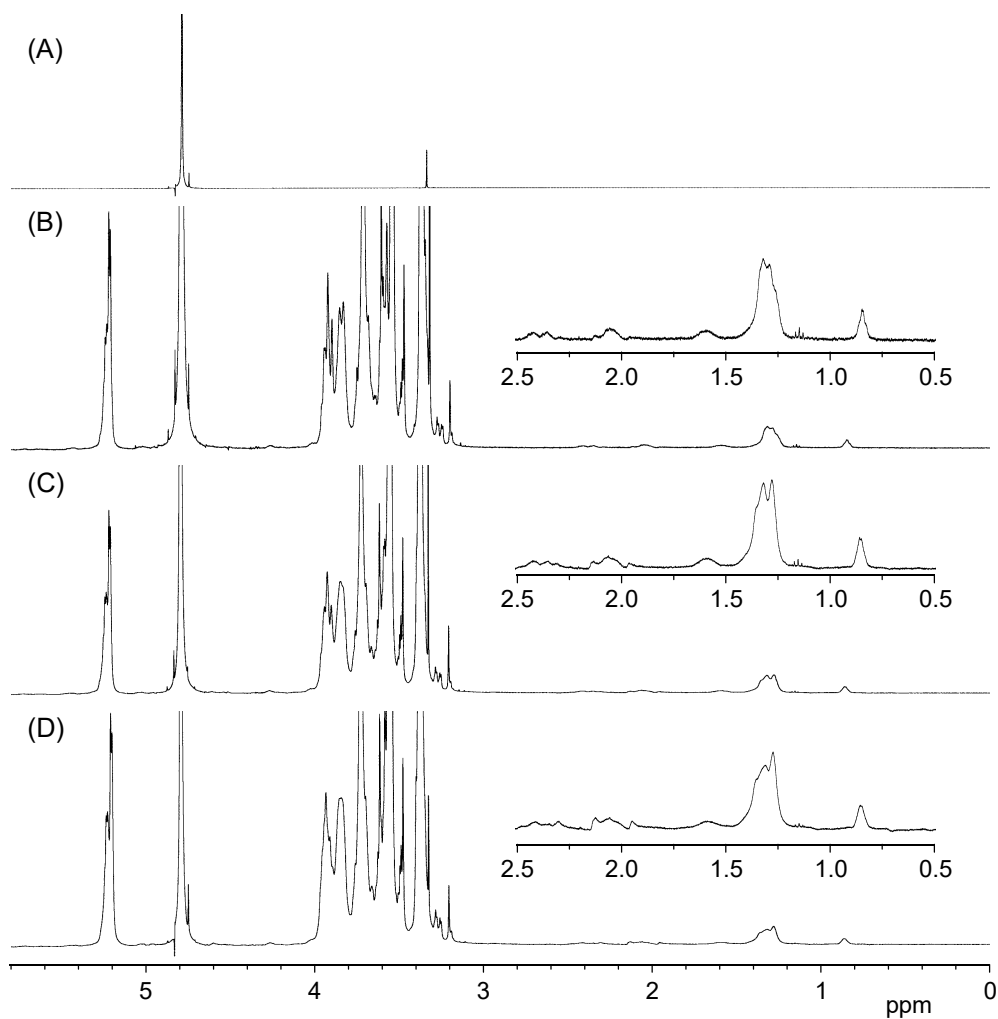

**Fig. S3** <sup>1</sup>H NMR spectra of the POPC liposomes (A) in the absence and presence of (B) 10.0, (C) 20.0 and (D) 30.0 equiv. of DMe-β-CDx ([DPPC] = 1.0 mM, 400 MHz, D<sub>2</sub>O, 25 °C). The inset shows the 0.50–2.50 ppm region of the spectra.

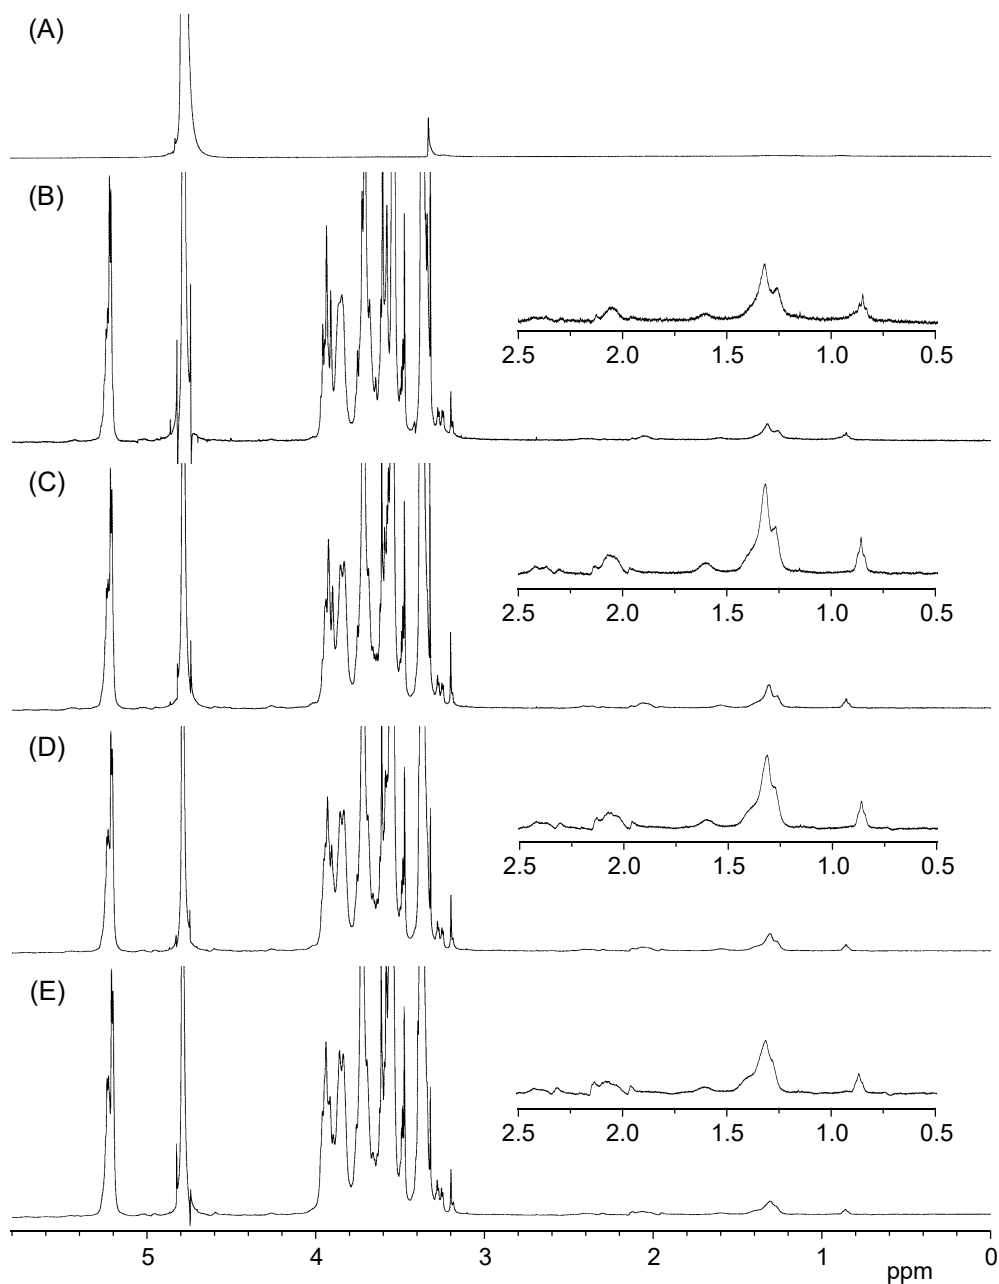

**Fig. S4** <sup>1</sup>H NMR spectra of the DOPC liposomes (A) in the absence and presence of (B) 10.0, (C) 20.0, (D) 30.0 and (E) 40.0 equiv. of DMe-β-CDx ([DOPC] = 1.0 mM, 400 MHz, D<sub>2</sub>O, 25 °C). The inset shows the 0.50–2.50 ppm region of the spectra.

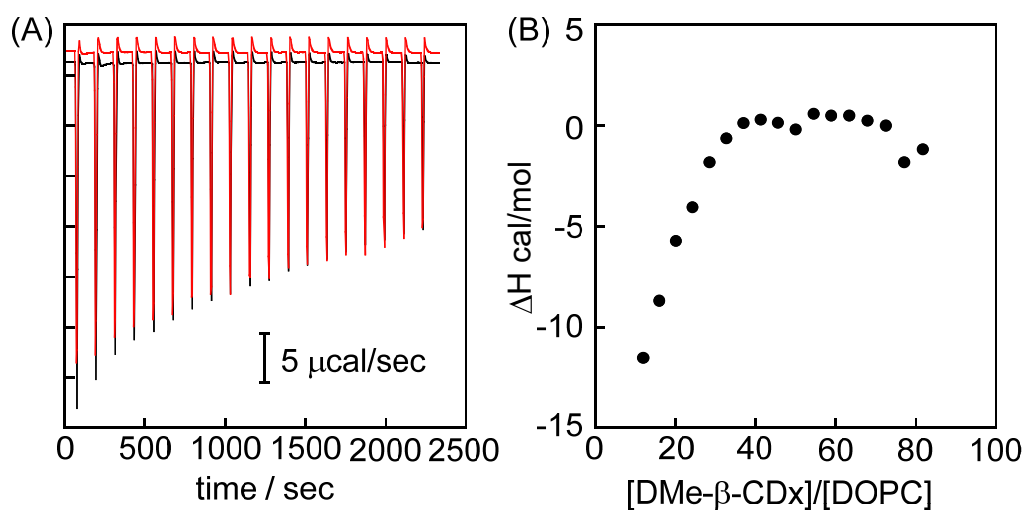

**Fig. S5** (A) Microcalorimetric titration of DMe- $\beta$ -CDx into water (red line) and a solution of DOPC (black line). The graph corresponds to the raw data for 19 sequential injection (2  $\mu\text{L}$  per injection) of DMe- $\beta$ -CDx solution (100 mM) injecting into water (200  $\mu\text{L}$ ) to determine the heat of dilution or a DOPC liposomes solution (200  $\mu\text{L}$ , 0.5 mM). (B) Net heat effects of complexation of DOPC with DMe- $\beta$ -CDx for each injection, obtained by subtracting the heat of dilution from the heat of reaction. ( $[\text{DOPC}] = 0.5 \text{ mM}$ , water, 25  $^{\circ}\text{C}$ ).

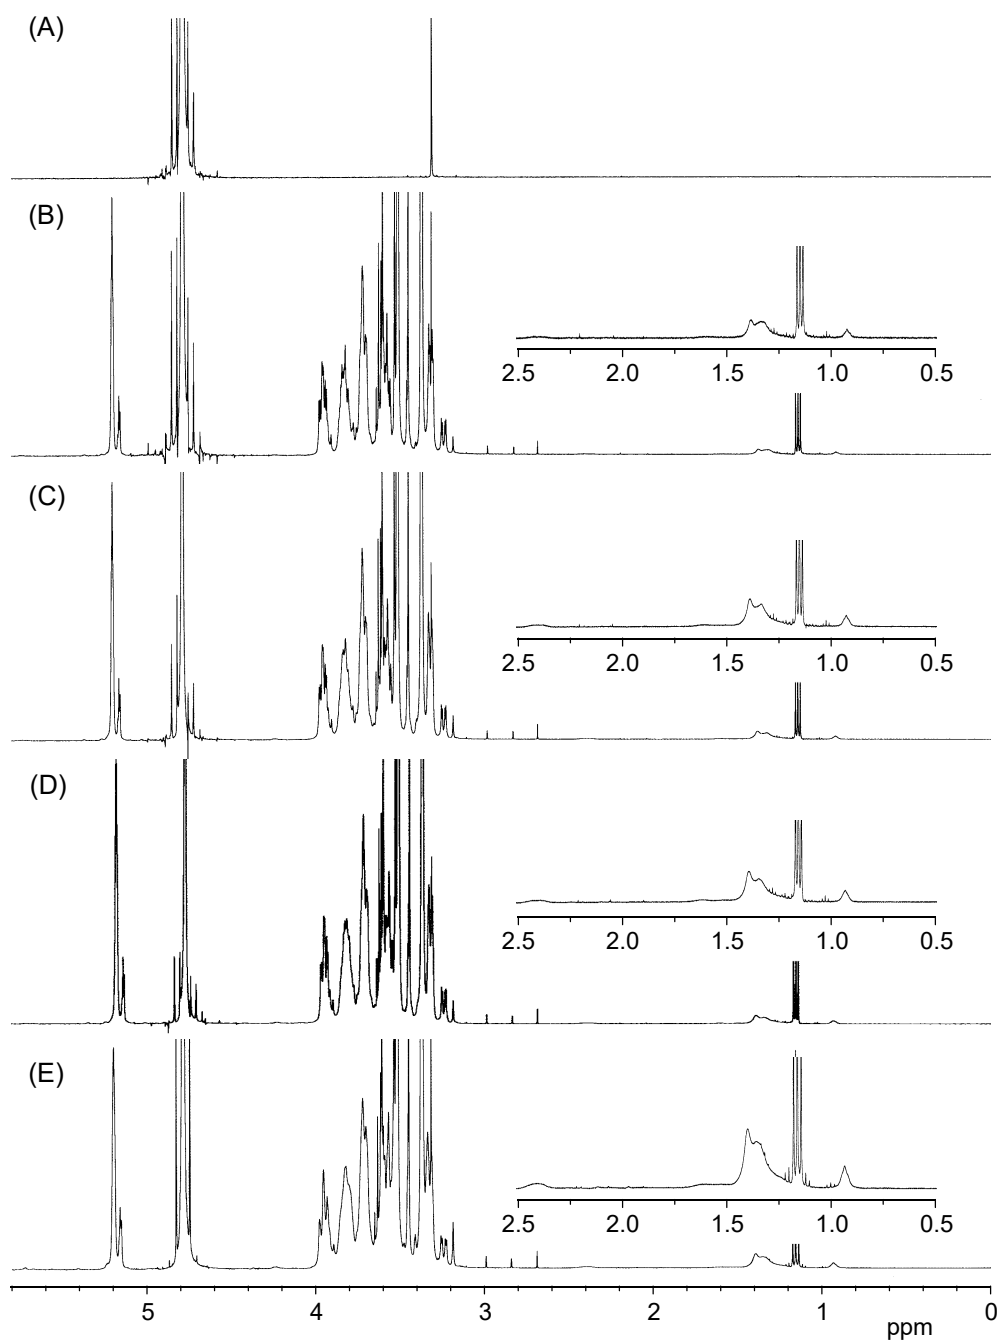

**Fig. S6** <sup>1</sup>H NMR spectra of the DPPC liposomes (A) in the absence and presence of (B) 10.0, (C) 20.0, (D) 30.0 and (E) 40.0 equiv. of DMe- $\alpha$ -CDx ([DPPC] = 1.0 mM, 400 MHz, D<sub>2</sub>O, 25 °C). The inset shows the 0.50–2.50 ppm region of the spectra.

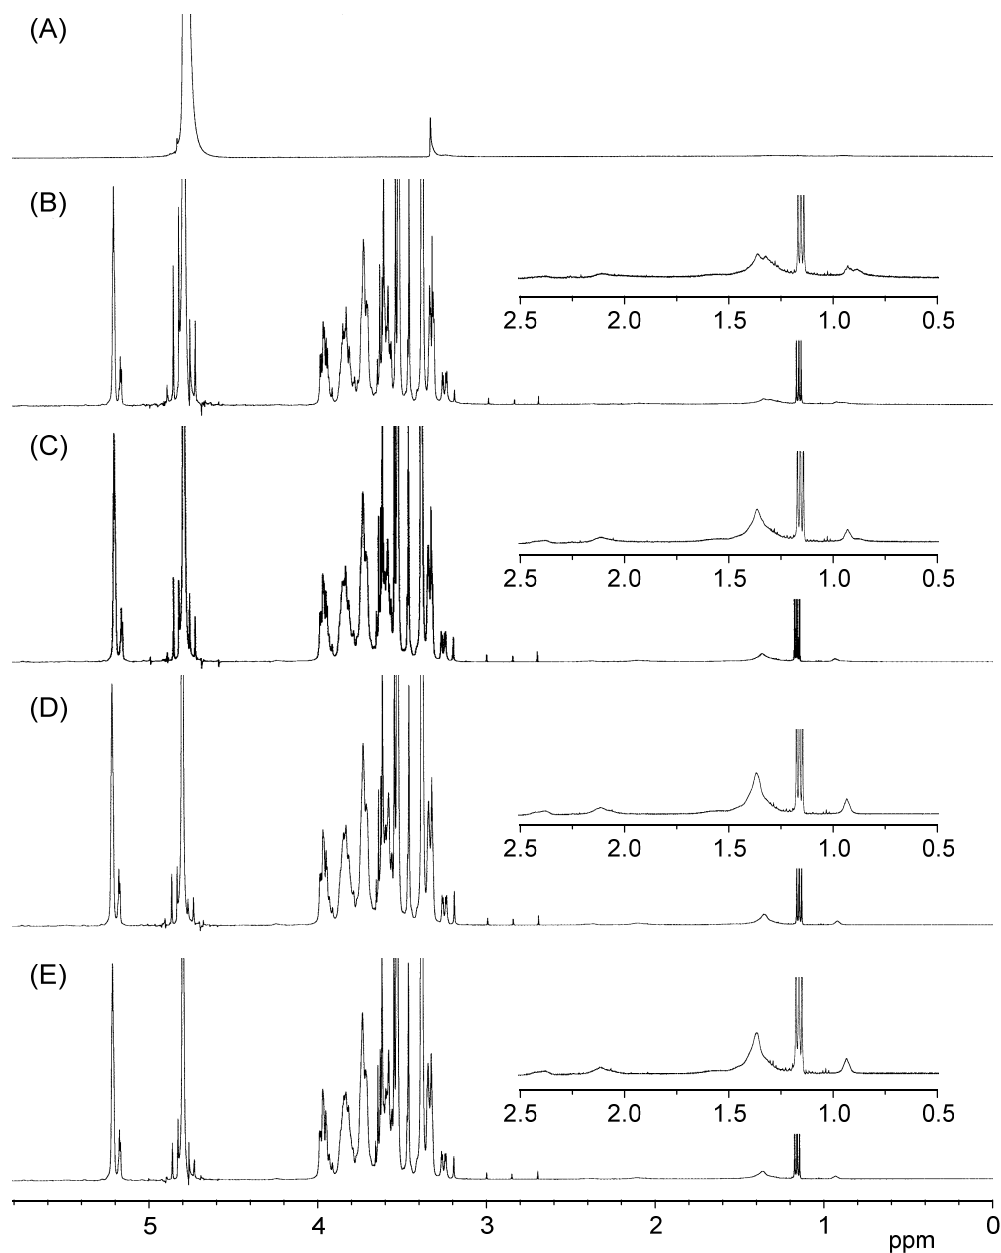

**Fig. S7**  $^1\text{H}$  NMR spectra of the DOPC liposomes (A) in the absence and presence of (B) 10.0, (C) 20.0, (D) 30.0 and (E) 40.0 equiv. of DMe- $\alpha$ -CDx ( $[\text{DOPC}] = 1.0$  mM, 400 MHz,  $\text{D}_2\text{O}$ , 25  $^\circ\text{C}$ ). The inset shows the 0.50–2.50 ppm region of the spectra.



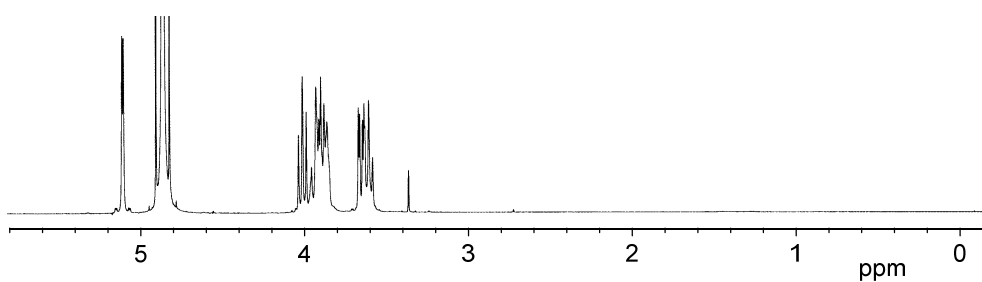

**Fig. S8** <sup>1</sup>H NMR spectrum of the DPPC• $\alpha$ -CDx mixture immediately after mixing ([DPPC] = 1.0 mM, [ $\alpha$ -CDx]/[DPPC] = 10 equiv.). D<sub>2</sub>O, 23 °C, 400 MHz.
